# Supplementary figures and images for: Multiplexed assays of human disease-relevant mutations reveal UTR dinucleotide composition as a major determinant of RNA stability
Source: eLife journal article supplement (doi:10.7554/elife.97682), 2024-06-19

# Post-transfection

M

1<sup>st</sup> 2<sup>nd</sup> 3<sup>rd</sup> time points

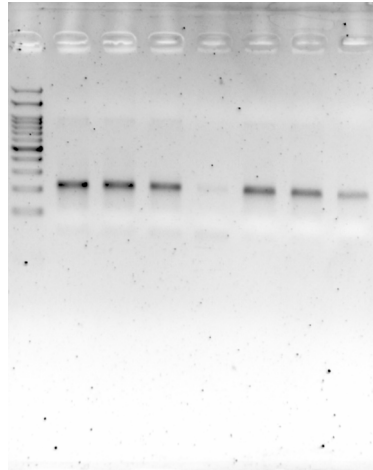

Supplement: fig1-data1 [file elife-97682-fig1-data1-v1.zip]

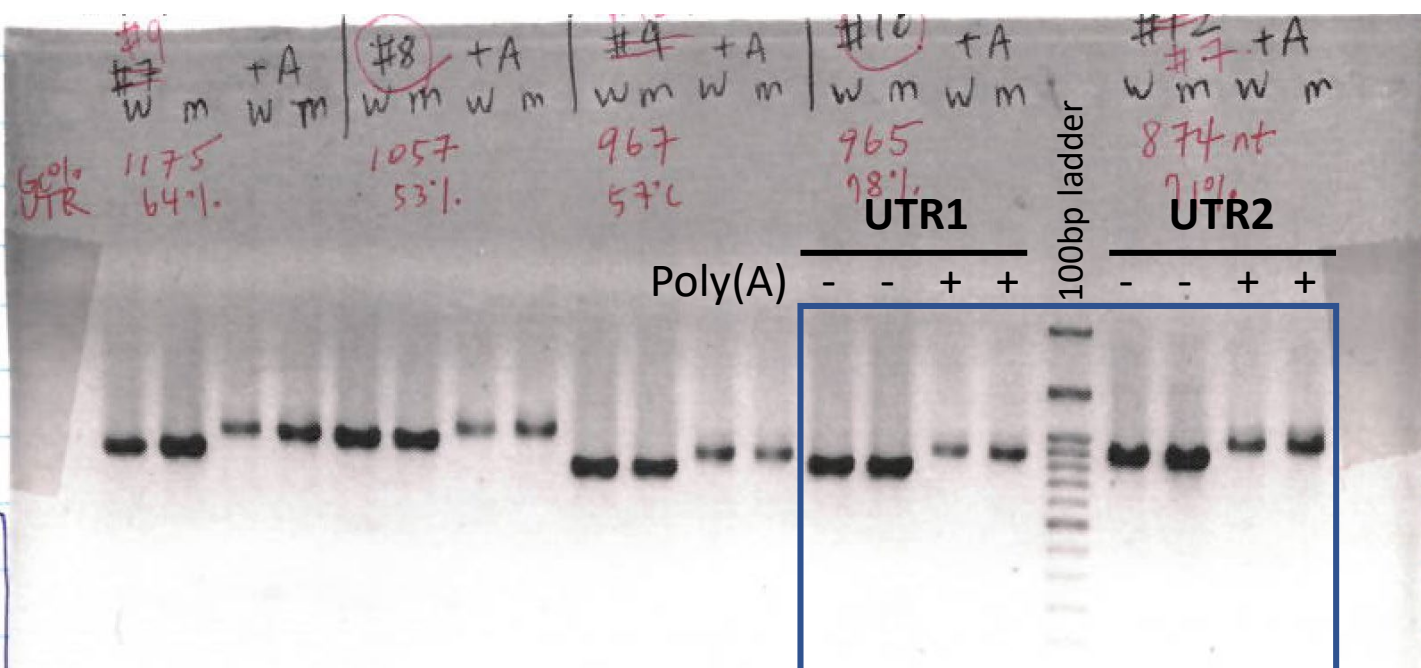

~100ng/lane 1% 0.5x TBE

Supplement: fig1-figsupp1-data2 [file elife-97682-fig1-figsupp1-data2-v1.zip]
